# Supplementary material for: Microfluidic arenas for war games between neutrophils and microbes
Source: Royal Society of Chemistry journal article supplement (doi:10.1039/c8lc01263f), 2019-01-01
Supplement: c8lc01263f5.pdf [file c8lc01263f5.pdf]

**Table S1. Patient characteristics**

| Patient ID | Age | Sex | Diagnosis                                                                    | Clinical notes                                                                                                                                                                                                                                                                                                                                                       |
|------------|-----|-----|------------------------------------------------------------------------------|----------------------------------------------------------------------------------------------------------------------------------------------------------------------------------------------------------------------------------------------------------------------------------------------------------------------------------------------------------------------|
| 1          | 57  | M   | No infection                                                                 | Admitted for open repair of a thoracoabdominal aneurysm. He was extubated on post-operative day 2 but stayed on vasopressors to maintain an elevated mean arterial pressure per the vascular surgery team. He remained on vasopressors for 6 days post-operatively and was eventually transferred to the floor. The remainder of his hospital course was uneventful. |
| 2          | 76  | M   | No infection                                                                 | Admitted for endovascular repair of an abdominal aortic aneurysm and Left femoral endarterectomy. He was maintained on neosynephrine post-operatively to maintain blood pressure goals set by vascular surgery. The remainder of his hospital course was uneventful.                                                                                                 |
| 3          | 66  | F   | No infection                                                                 | She was admitted s/p resection of sarcoma. She was weaned off suppressors and extubated a few days after her surgery. The remainder of her hospital course was uneventful.                                                                                                                                                                                           |
| 4          | 65  | M   | Pneumonia, microbe not identified                                            | He was empirically started on antibiotics at another facility for ascending cholangitis and gallstone pancreatitis. In the ICU, he was treated empirically for pneumonia. He had a prolonged hospital course but was eventually discharged to rehab.                                                                                                                 |
| 5          | 87  | M   | Empyema, <i>Pseudomonas aeruginosa</i> Colitis, <i>Clostridium difficile</i> | He was admitted with empyema from pseudomonas aeruginosa. He had additional chest tubes placed for drainage. He developed <i>C. diff</i> colitis during his course and was treated. After a prolonged hospital course, he was eventually discharged.                                                                                                                 |
| 6          | 49  | F   | Pneumonia, <i>Staphylococcus aureus</i>                                      | She was admitted after an open thoracoabdominal aneurysm repair. She was started on antibiotics for a staphylococcus aureus pneumonia. The remainder of her course was uneventful.                                                                                                                                                                                   |
