# Supplementary figures and images for: Microfluidic arenas for war games between neutrophils and microbes
Source: Royal Society of Chemistry journal article supplement (doi:10.1039/c8lc01263f), 2019-01-01

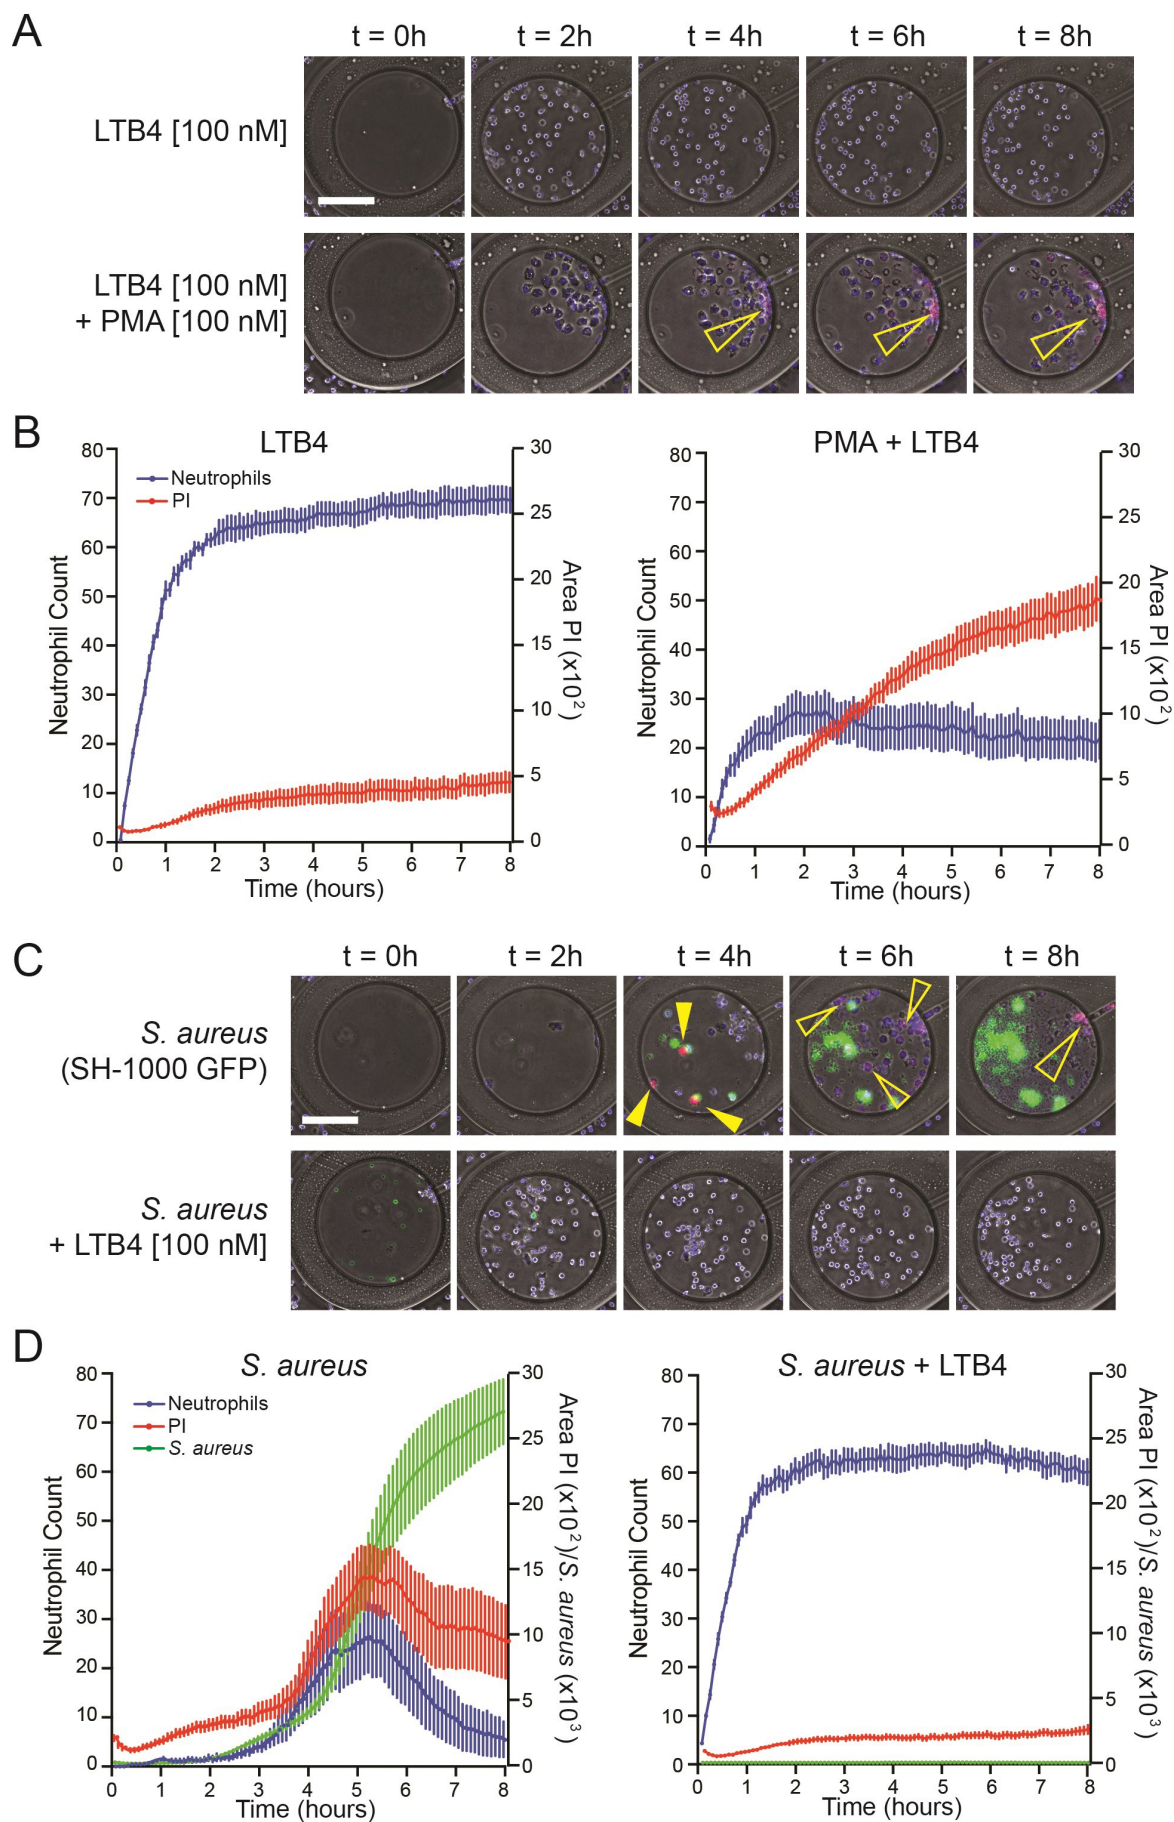

Supplement: c8lc01263f3.pdf [file c8lc01263f3.pdf]
